# Supplementary material
Source: MDPI journal article supplement (https://www.mdpi.com/2077-0472/4/3/239)
Supplement: s2 [file s2]

## Supplementary Materials

**Figure S1.** ATR-IR spectra of freeze-dried OS and SOS.

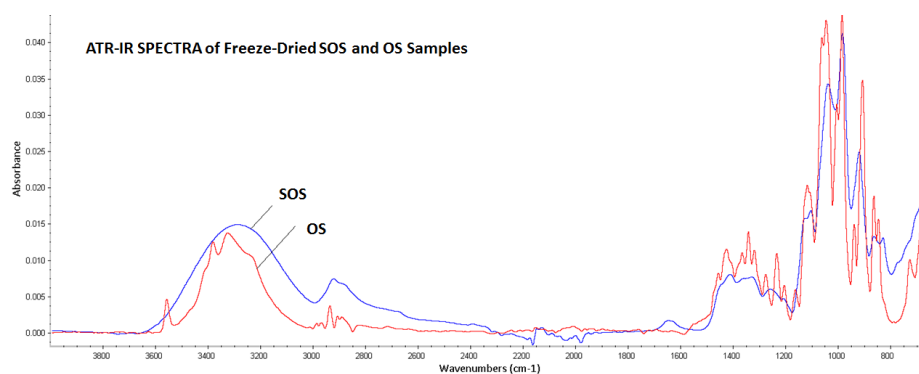

© 2014 by the authors; licensee MDPI, Basel, Switzerland. This article is an open access article distributed under the terms and conditions of the Creative Commons Attribution license (<http://creativecommons.org/licenses/by/4.0/>).
